# Supplementary material for: The microbiome of an invasive Antarctic insect, Eretmoptera murphyi (Diptera: Chironomidae), and its potential role in nutrient cycling
Source: Research Square preprint supplement (doi:10.21203/rs.3.rs-7744438/v1), 2025-10-14
Supplement: Supplementary file 1 [file 3c3daad2e660b4a39b4574a2.docx]

**Supplementary Information**

Article title: The microbiome of an invasive Antarctic insect, *Eretmoptera murphyi* (Diptera: Chironomidae), and its potential role in nutrient cycling

Journal name: Microbial Ecology (Insect Microbiome Collection)

Authors

Octavia D. M. Brayley1,2 ([oxb233@student.bham.ac.uk](mailto:oxb233@student.bham.ac.uk); <https://orcid.org/0000-0003-1826-543X>), Kirsty McCready1 (<https://orcid.org/0000-0002-1175-5973>), Shengwei Liu3 (<https://orcid.org/0000-0001-6418-2884>), Peter Convey1,2,4,5 (<https://orcid.org/0000-0001-8497-9903>), Yin Chen1​​ (<https://orcid.org/0000-0002-0367-4276>), Sami Ullah6,7

(<https://orcid.org/0000-0003-0963-7457>), Nicholas Teets8

(<https://orcid.org/0000-0002-9153-8847>), Scott A.L. Hayward1,7 (<https://orcid.org/0000-0002-1899-6630>)

1School of Biosciences, University of Birmingham, Birmingham, B15 2TT, United Kingdom

2British Antarctic Survey, NERC, High Cross, Madingley Road, Cambridge, CB3 0ET, United Kingdom

3School of Life Sciences, University of Warwick, Gibbet Hill Campus, Coventry, CV4 7AL, United Kingdom

4Department of Zoology, University of Johannesburg, Auckland Park 2006, South Africa

5Biodiversity of Antarctic and Sub-Antarctic Ecosystems (BASE), Santiago, Chile

6School of Geography, Earth and Environmental Sciences, University of Birmingham, Edgbaston, Birmingham, B15 2TT, United Kingdom

7The Birmingham Institute of Forest Research, University of Birmingham, Edgbaston, Birmingham, B15 2TT, United Kingdom

8Department of Entomology, University of Kentucky, Lexington, Kentucky, 40546, United States of America


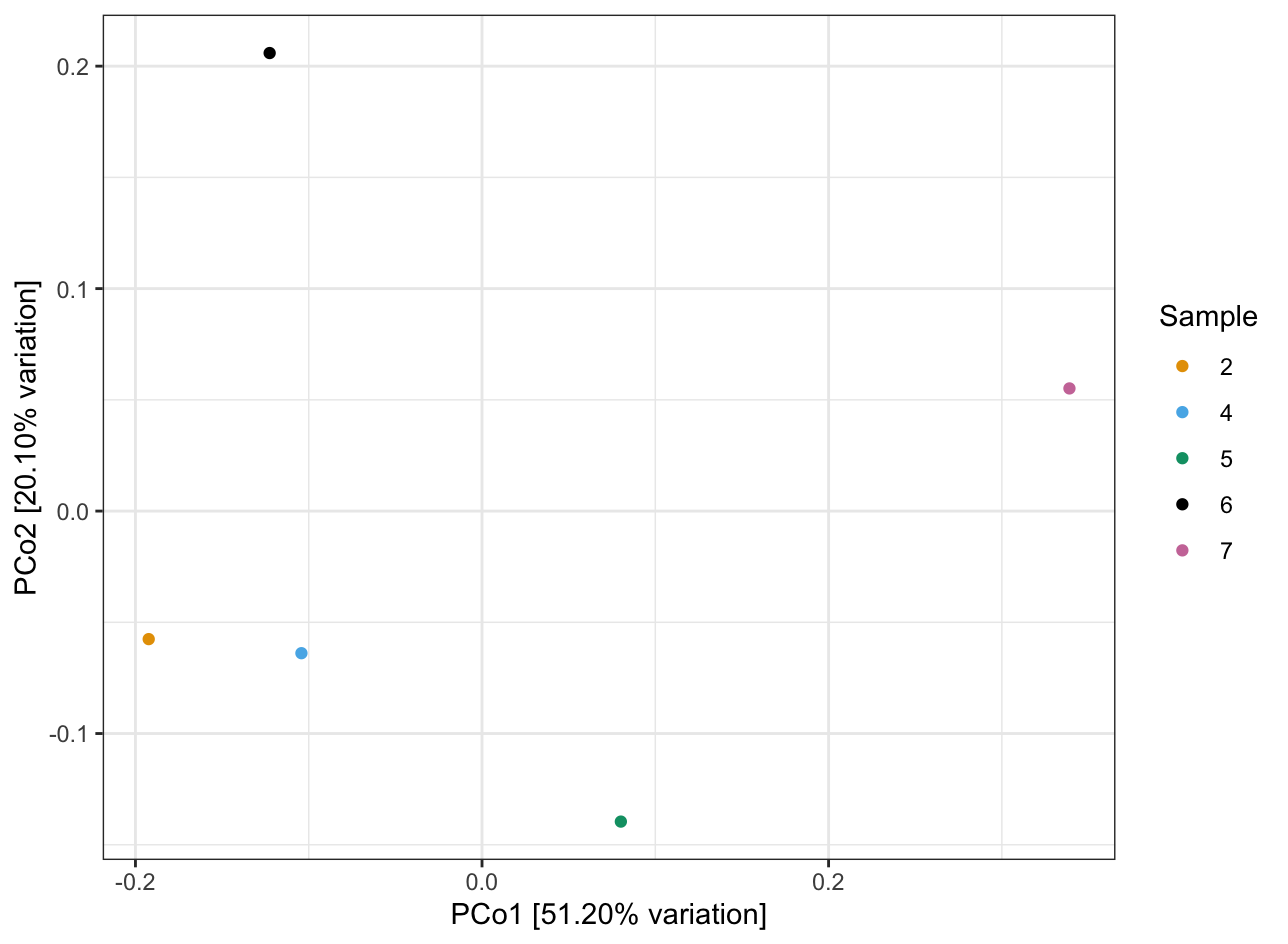


**Fig. S1** Principal coordinates analysis (PCoA) of microbial community composition based on Bray–Curtis dissimilarity. PCoA plot showing variation in microbial communities across bacterial samples (n = 5). Each point represents one sample, coloured according to sample ID (2, 4, 5, 6, 7). Axis labels indicate the proportion of total variation explained by the first two principal coordinates (PCo1 = 51.2%; PCo2 = 20.1%).


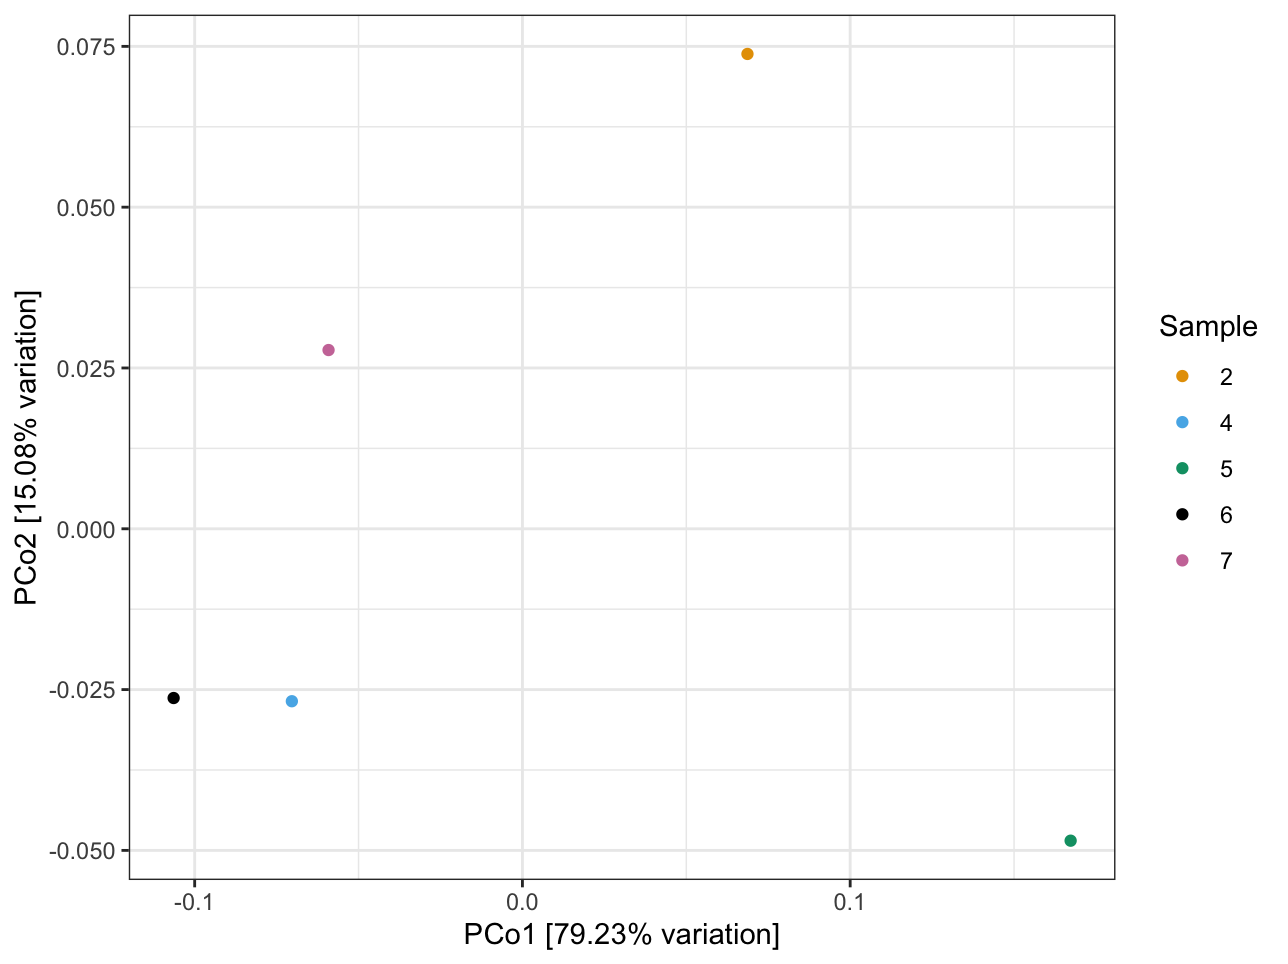


**Fig. S2** Principal coordinates analysis (PCoA) of microbial community composition based on Bray–Curtis dissimilarity. PCoA plot showing variation in microbial communities across archaeal samples (n = 5). Each point represents one sample, coloured according to sample ID (2, 4, 5, 6, 7). Axis labels indicate the proportion of total variation explained by the first two principal coordinates (PCo1 = 51.2%; PCo2 = 20.1%).


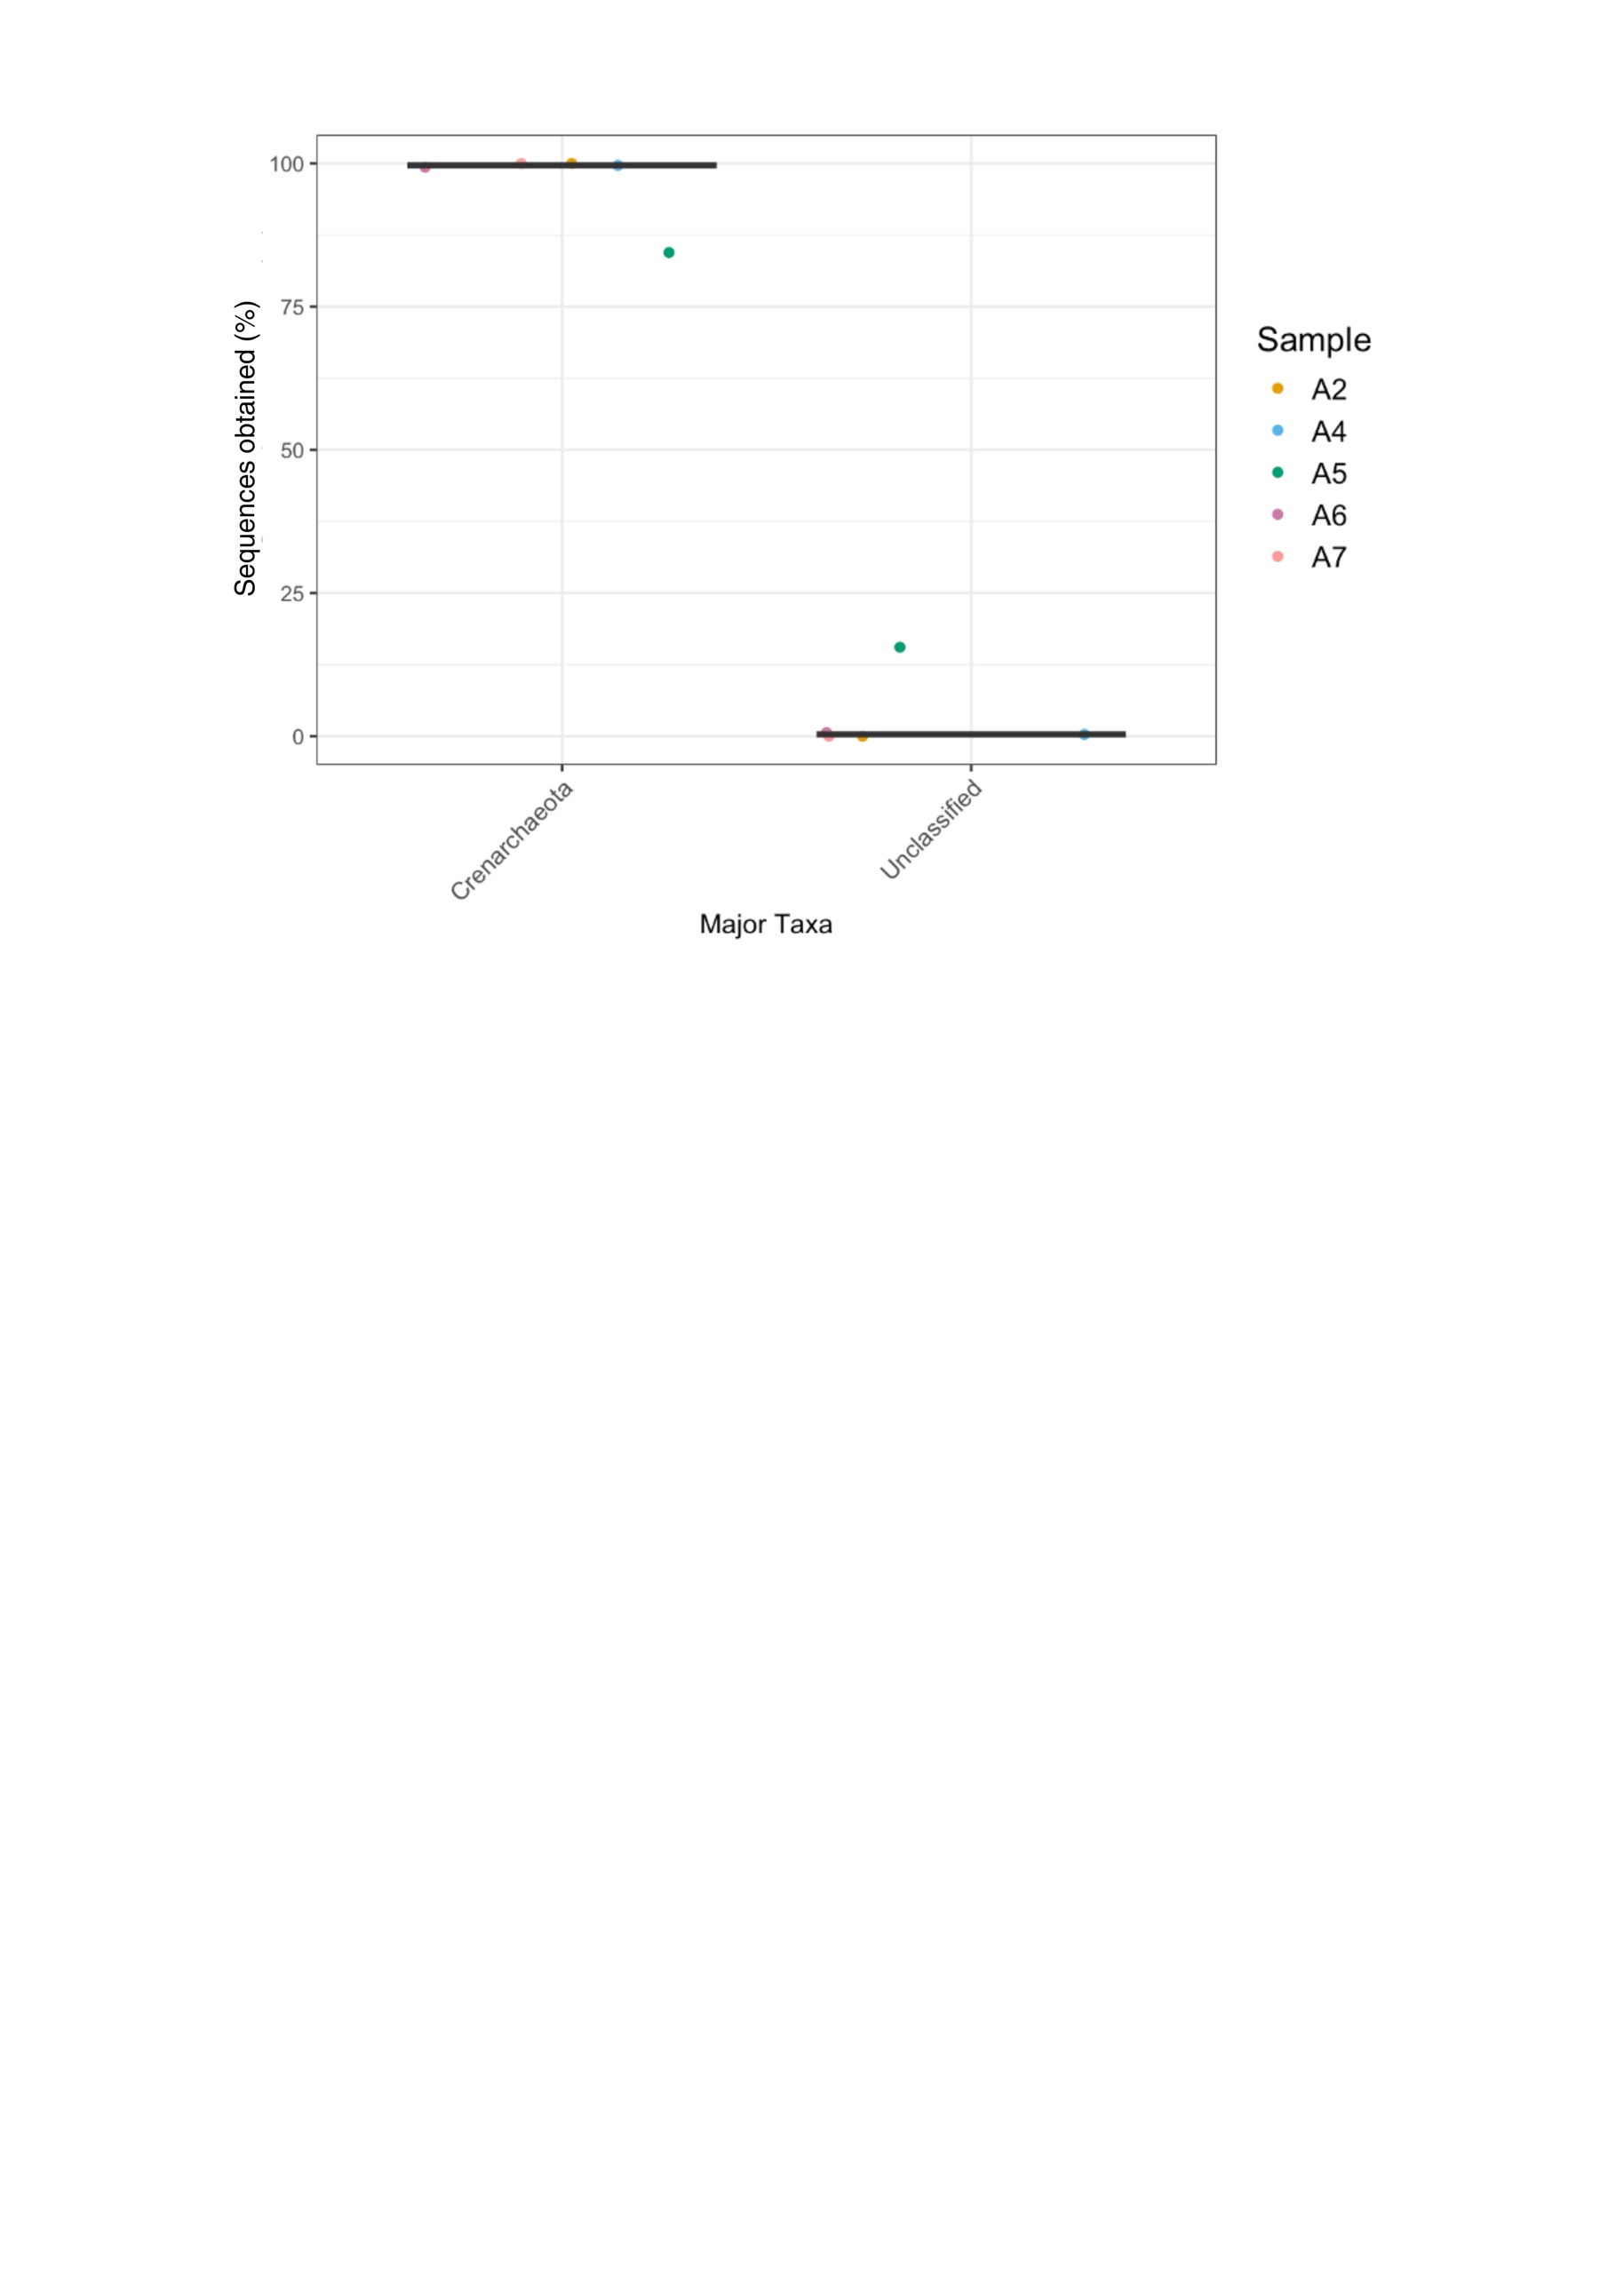


**Fig. S3** Archaeal 16S rRNA gene ASVs classified by phylum obtained from five *E. murphyi* larvae. Each point represents the relative proportion (%) of 16S rRNA gene copies assigned to either Crenarchaeota or an unclassified taxon. Horizontal black lines represent the boxplot median; in these data Q1 and Q3 equal the median, so each box collapses to a single line.
